# Supplementary material for: Correlations between Resting Electrocardiogram Findings and Disease Profiles: Insights from the Qatar Biobank Cohort
Source: MDPI journal article supplement (doi:10.3390/jcm13010276), 2024-01-03
Supplement: s1 [file s1]

**Table S1.** Effect sizes and variable importance of the traits included in the risk scores using multi-variate regression and xgboost.

| Multivariate Regression |             |          | xgboost         |        |          |           |
|-------------------------|-------------|----------|-----------------|--------|----------|-----------|
| Trait                   | Effect size | P-value  | Trait           | Gain   | Cover    | Frequency |
| T2D                     | 0.995       | 3.20E-10 | T2D             | 0.2602 | 2.63E-01 | 0.15      |
| Smoking                 | 0.760       | 1.66E-08 | HbA1C           | 0.2210 | 2.11E-01 | 0.13      |
| QTc                     | 0.018       | 5.95E-08 | TC              | 0.1147 | 5.52E-02 | 0.11      |
| SBP                     | 0.020       | 5.25E-07 | QRS             | 0.0922 | 1.92E-01 | 0.18      |
| HbA1C                   | 0.220       | 8.98E-07 | SBP             | 0.0917 | 6.44E-02 | 0.08      |
| QRS                     | 0.018       | 4.02E-05 | QTc             | 0.0677 | 6.94E-02 | 0.10      |
| Potassium               | 0.647       | 6.35E-05 | Smoking         | 0.0365 | 2.11E-02 | 0.05      |
| DBP                     | -0.018      | 5.01E-03 | Fasting Glucose | 0.0267 | 4.68E-02 | 0.05      |
| RR                      | 0.001       | 8.01E-03 | RR              | 0.0261 | 8.75E-03 | 0.04      |
| Stroke                  | 0.833       | 1.39E-02 | Potassium       | 0.0226 | 2.32E-02 | 0.04      |
| SAS                     | 0.396       | 2.28E-02 | LDL-C           | 0.0206 | 7.94E-03 | 0.02      |
| PR                      | 0.006       | 2.37E-02 | PW              | 0.0079 | 4.97E-03 | 0.01      |
| Magnesium               | 1.880       | 2.62E-02 | TG              | 0.0044 | 4.84E-04 | 0.01      |
|                         |             |          | BMI             | 0.0018 | 2.94E-02 | 0.01      |
|                         |             |          | DBP             | 0.0017 | 6.86E-04 | 0.00      |
|                         |             |          | Insulin         | 0.0016 | 1.82E-04 | 0.00      |
|                         |             |          | Stroke          | 0.0014 | 6.08E-04 | 0.00      |
|                         |             |          | HDL-C           | 0.0007 | 4.22E-04 | 0.00      |
|                         |             |          | PR              | 0.0006 | 2.98E-05 | 0.00      |
